# Supplementary material for: Avidin and streptavidin ligands based on the glycoluril bicyclic system
Source: Royal Society of Chemistry journal article supplement (doi:10.1039/b605081f), 2006-01-01
Supplement: b605081f.pdf [file b605081f.pdf]

## Supporting information

### Avidin and streptavidin ligands based on the glycoluril bicyclic system

Pedro Hidalgo-Fernández, Eva Ayet, Ivan Canal, and Joan-Antoni Farrera\*

*Departament de Química Orgànica, Facultat de Química, Universitat de Barcelona, Martí i Franquès 1, 08028-Barcelona, Spain. E-mail: [jfarrera@ub.edu](mailto:jfarrera@ub.edu);*

#### a. Binding model and equations for a competitive titration with an enantiomerically pure ligand (single ligand).

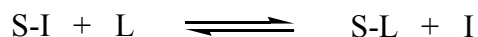

$$[I] = \frac{I_t}{1 + K_{IS} \times [S]} \quad [IS] = K_{IS} \times [S] \times [I]$$

$$[L] = \frac{L_t}{1 + K_{LS} \times [S]} \quad [LS] = K_{LS} \times [L] \times [S]$$

$$[S] = \frac{S_t}{1 + K_{IS} \times [I] + K_{LS} \times [L]}$$

Where

$I_t$  : Total concentration of indicator (HABA)

$S_t$  : Total concentration of protein subunits

$L_t$  : Total concentration of ligand

$[I]$  : Concentration of free indicator (HABA)

$[S]$  : Concentration of free protein subunits

$[L]$  : Concentration of free ligand

$[IS]$  : Concentration of complexed indicator

$[LS]$  : Concentration of complexed ligand

$K_{IS}$  : Binding constant of the indicator

$K_{LS}$  : Binding constant of the ligand

**b. Binding model and equations for a competitive titration with a racemic ligand (or a mixture of two ligands).**

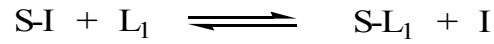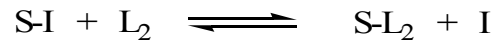

$$[I] = \frac{I_t}{1 + K_{IS} \times [S]}$$

$$[IS] = K_{IS} \times [S] \times [I]$$

$$[L_1] = \frac{L_{1t}}{1 + K_{L_1S} \times [S]}$$

$$[L_1S] = K_{L_1S} \times [S] \times [L_1]$$

$$[L_2] = \frac{L_{2t}}{1 + K_{L_2S} \times [S]}$$

$$[L_2S] = K_{L_2S} \times [S] \times [L_2]$$

$$[S] = \frac{S_t}{1 + K_{IS} \times [I] + K_{L_1S} \times [L_1] + K_{L_2S} \times [L_2]}$$

Where  $I_t$ ,  $S_t$ ,  $[S]$ ,  $[IS]$  and  $K_{IS}$  are as in part b of the supporting information, and

$L_{1t}$  = Total concentration of ligand 1 (or enantiomer 1)

$L_{2t}$  = Total concentration of ligand 2 (or enantiomer 2)

$[L_1S]$  = Concentration of complexed ligand 1

$[L_2S]$  = Concentration of complexed ligand 2

$K_{L_1S}$  = Binding constant of ligand 1

$K_{L_2S}$  = Binding constant of ligand 2

c. Binding isotherms from the competitive spectrophotometric titrations of the (S)Av-HABA complex with glycoluril-type ligands.

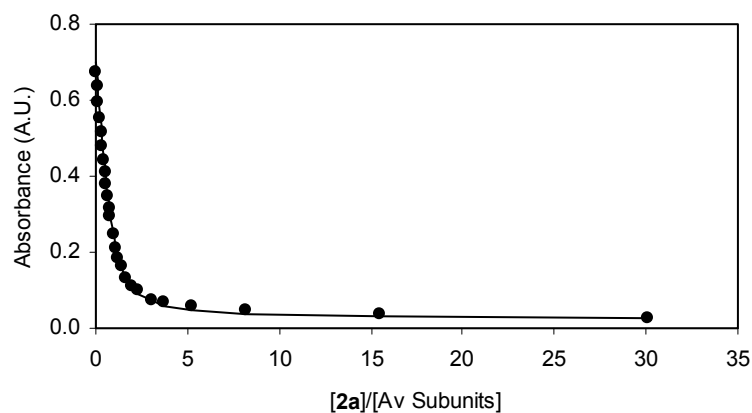

Figure 1. Absorption change at 500 nm in the titration of Av 5.7  $\mu\text{M}$  (tetramer) and HABA 49.4  $\mu\text{M}$  with ligand **2a** in phosphate buffer 0.1 M, pH = 7.0. The solid line represents the fit of the data to the (1:1) binding model.

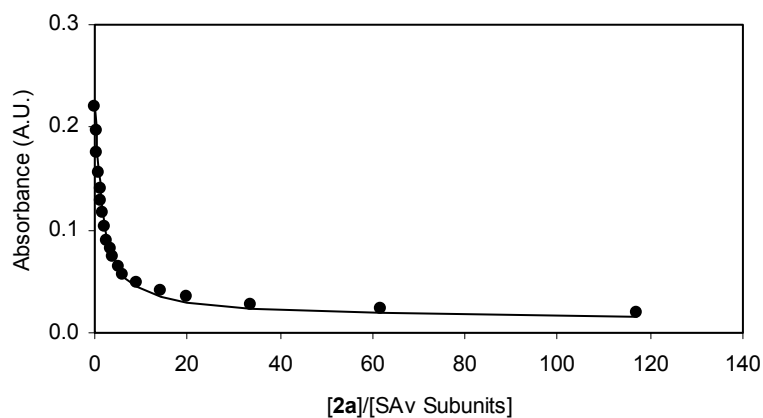

Figure 2. Absorption change at 500 nm in the titration of Sav 10.6  $\mu\text{M}$  (tetramer) and HABA 35.7  $\mu\text{M}$  with ligand **2a** in phosphate buffer 0.1 M, pH = 7.0. The solid line represents the fit of the data to the (1:1) binding model.

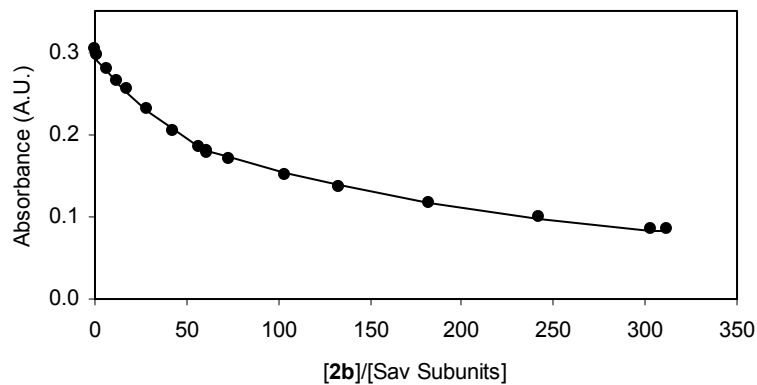

Figure 3. Absorption change at 500 nm in the titration of Sav 11.2  $\mu\text{M}$  (tetramer) and HABA 38.5  $\mu\text{M}$  with ligand **2b** in phosphate buffer 0.1 M, pH = 7.0. The solid line represents the fit of the data to the (1:1) binding model.

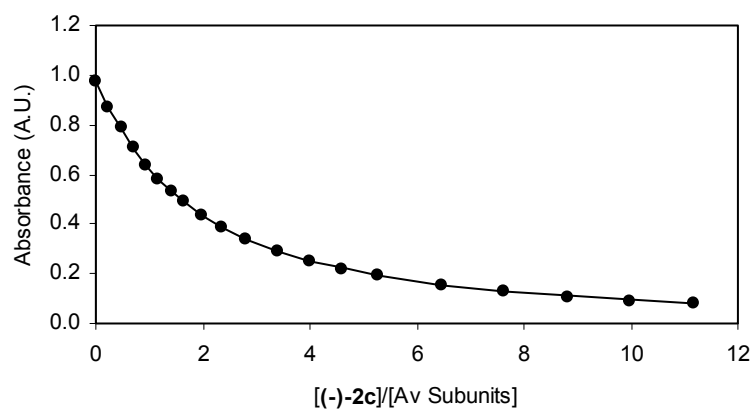

Figure 4. Absorption change at 500 nm in the titration of Av 9.3  $\mu\text{M}$  (tetramer) and HABA 43.6  $\mu\text{M}$  with ligand **(-)-2c** in phosphate buffer 0.1 M, pH = 7.0. The solid line represents the fit of the data to the (1:1) binding model.

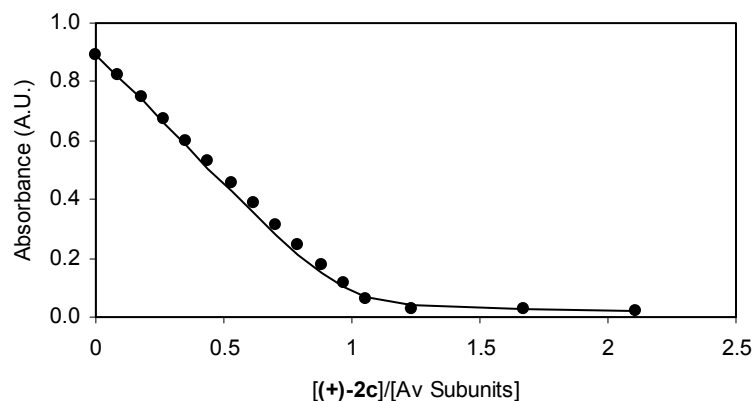

Figure 5. Absorption change at 500 nm in the titration of Av 8.7  $\mu\text{M}$  (tetramer) and HABA 37.5  $\mu\text{M}$  with ligand **(+)-2c** in phosphate buffer 0.1 M, pH = 7.0. The solid line represents the fit of the data to the (1:1) binding model.

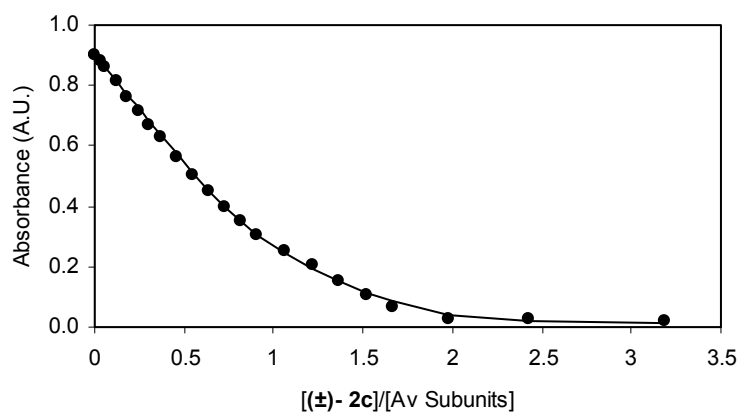

Figure 6. Absorption change at 500 nm in the titration of Av 12.5  $\mu\text{M}$  (tetramer) and HABA 31.5  $\mu\text{M}$  with racemic **2c** in phosphate buffer 0.1 M, pH = 7.0. The solid line represents the fit of the data to the (1:1) binding model considering different binding constants for each enantiomer.

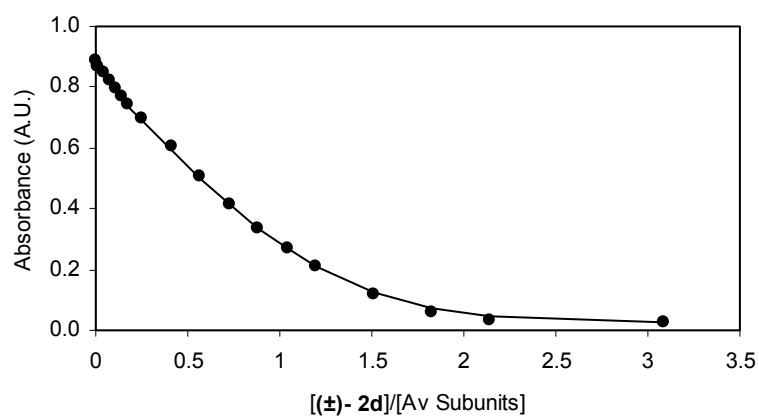

Figure 7. Absorption change at 500 nm in the titration of Av 9.3  $\mu\text{M}$  (tetramer) and HABA 38.3  $\mu\text{M}$  with racemic **2d** in phosphate buffer 0.1 M, pH = 7.0. The solid line represents the fit of the data to the (1:1) binding model considering different binding constants for each enantiomer.
